# Supplementary material
Source: PubMed Central journal article supplement (PMC6224301)
Supplement: NIHMS978128-supplement-11605_2018_3850_MOESM1_ESM.pdf [file NIHMS978128-supplement-11605_2018_3850_MOESM1_ESM.pdf]

**Supplemental Table 1.** International Classification of Diseases, 9<sup>th</sup> revision, Clinical Modification principle diagnosis code for malignant gastrointestinal cancers

| Description                                                       | ICD-9-CM |
|-------------------------------------------------------------------|----------|
| Diagnosis ICD-9-CM Codes                                          |          |
| <b>Esophageal malignant neoplasm</b>                              |          |
| Malignant neoplasm of cervical esophagus                          | 150.0    |
| Malignant neoplasm of thoracic esophagus                          | 150.1    |
| Malignant neoplasm of abdominal esophagus                         | 150.2    |
| Malignant neoplasm of upper third of esophagus                    | 150.3    |
| Malignant neoplasm of middle third of esophagus                   | 150.4    |
| Malignant neoplasm of lower third of esophagus                    | 150.5    |
| Malignant neoplasm of other specified parts of esophagus          | 150.8    |
| Malignant neoplasm of esophagus unspecified site                  | 150.9    |
| <b>Gastric malignant neoplasm</b>                                 |          |
| Malignant neoplasm of cardia                                      | 151.0    |
| Malignant neoplasm of pylorus                                     | 151.1    |
| Malignant neoplasm of pyloric antrum                              | 151.2    |
| Malignant neoplasm of fundus of stomach                           | 151.3    |
| Malignant neoplasm of body of stomach                             | 151.4    |
| Malignant neoplasm of lesser curvature of stomach unspecified     | 151.5    |
| Malignant neoplasm of greater curvature of stomach unspecified    | 151.6    |
| Malignant neoplasm of other specified sites of stomach            | 151.8    |
| Malignant neoplasm of stomach unspecified site                    | 151.9    |
| <b>Colonic malignant neoplasm</b>                                 |          |
| Malignant neoplasm of hepatic flexure                             | 153.0    |
| Malignant neoplasm of transverse colon                            | 153.1    |
| Malignant neoplasm of descending colon                            | 153.2    |
| Malignant neoplasm of sigmoid colon                               | 153.3    |
| Malignant neoplasm of cecum                                       | 153.4    |
| Malignant neoplasm of ascending colon                             | 153.6    |
| Malignant neoplasm of splenic flexure                             | 153.7    |
| Malignant neoplasm of other specified sites of large intestine    | 153.8    |
| Malignant neoplasm of colon unspecified site                      | 153.9    |
| <b>Hepatic malignant neoplasm</b>                                 |          |
| Malignant neoplasm of liver primary                               | 155.0    |
| Malignant neoplasm of intrahepatic bile ducts                     | 155.1    |
| Malignant neoplasm of liver not specified as primary or secondary | 155.2    |
| <b>Pancreatic malignant neoplasm</b>                              |          |
| Malignant neoplasm of head of pancreas                            | 157.0    |
| Malignant neoplasm of body of pancreas                            | 157.1    |
| Malignant neoplasm of pancreatic duct                             | 157.3    |
| Malignant neoplasm of islets of Langerhans                        | 157.4    |
| Malignant neoplasm of other specified sites of pancreas           | 157.8    |
| Malignant neoplasm of pancreas part unspecified                   | 157.9    |
| <b>Rectal malignant neoplasm</b>                                  |          |
| Malignant neoplasm of rectosigmoid junction                       | 154.0    |
| Malignant neoplasm of rectum                                      | 154.1    |
| Malignant neoplasm of other sites of rectum rectosigmoid junction | 154.8    |

**Supplemental Table 2.** International Classification of Diseases, 9<sup>th</sup> revision, Clinical Modification principle procedure codes for major cancer-related resections performed in an inpatient hospital facility

| Description                                                    | ICD-9-CM |
|----------------------------------------------------------------|----------|
| Procedure ICD-9-CM Codes                                       |          |
| <b>Esophageal resection</b>                                    |          |
| Esophagectomy, not otherwise specified                         | 42.40    |
| Partial esophagectomy                                          | 42.41    |
| Total esophagectomy                                            | 42.42    |
| Intrathoracic esophagoesophagostomy                            | 42.51    |
| <b>Gastric resection</b>                                       |          |
| Partial gastrectomy with anastomosis to esophagus              | 43.5     |
| Partial gastrectomy with anastomosis to duodenum               | 43.6     |
| Partial gastrectomy with anastomosis to jejunum                | 43.7     |
| Partial gastrectomy with jejunal transposition                 | 43.81    |
| Other partial gastrectomy with bypass gastrogastrostomy        | 43.89    |
| Total gastrectomy with intestinal interposition                | 43.91    |
| Other total gastrectomy                                        | 43.99    |
| <b>Colonic resection</b>                                       |          |
| Laparoscopic multiple segmental resection of large intestine   | 17.31    |
| Laparoscopic cecectomy                                         | 17.32    |
| Laparoscopic right hemicolectomy                               | 17.33    |
| Laparoscopic resection of transverse colon                     | 17.34    |
| Laparoscopic left hemicolectomy                                | 17.35    |
| Laparoscopic sigmoidectomy                                     | 17.36    |
| Other laparoscopic partial excision of large intestine         | 17.39    |
| Laparoscopic total intra-abdominal colectomy                   | 45.81    |
| Open total intra-abdominal colectomy                           | 45.82    |
| Other and unspecified total intra-abdominal colectomy          | 45.83    |
| Open and other multiple segmental resection of large intestine | 45.71    |
| Open and other cecectomy                                       | 45.72    |
| Open and other right hemicolectomy                             | 45.73    |
| Open and other resection of transverse colon                   | 45.74    |
| Open and other left hemicolectomy                              | 45.75    |
| Open and other sigmoidectomy                                   | 45.76    |
| Other and unspecified partial excision of large intestine      | 45.79    |
| <b>Hepatic resection</b>                                       |          |
| Marsupialization of lesion of liver                            | 50.21    |
| Partial hepatectomy                                            | 50.22    |
| Open ablation of liver lesion or tissue                        | 50.23    |
| Percutaneous ablation of liver lesion or tissue                | 50.24    |
| Laparoscopic ablation of liver lesion or tissue                | 50.25    |
| Other and unspecified ablation of liver lesion or tissue       | 50.26    |
| Other destruction of lesion of liver                           | 50.29    |
| Lobectomy of liver                                             | 50.3     |
| <b>Pancreatic resection</b>                                    |          |
| Proximal pancreatectomy                                        | 52.51    |
| Distal pancreatectomy                                          | 52.52    |
| Radical subtotal pancreatectomy                                | 52.53    |
| Other partial pancreatectomy                                   | 52.59    |

|                                 |      |
|---------------------------------|------|
| Total pancreatectomy            | 52.6 |
| Radical pancreaticoduodenectomy | 52.7 |

**Rectal resection**

|                                                                   |       |
|-------------------------------------------------------------------|-------|
| Abdominoperineal resection of the rectum, not otherwise specified | 48.50 |
| Laparoscopic abdominoperineal resection of the rectum             | 48.51 |
| Open abdominoperineal resection of the rectum                     | 48.52 |
| Other abdominoperineal resection of the rectum                    | 48.59 |
| Transsacral rectosigmoidectomy                                    | 48.61 |
| Anterior resection of rectum with synchronous colostomy           | 48.62 |
| Other anterior resection of rectum                                | 48.63 |
| Posterior resection of rectum                                     | 48.64 |
| Duhamel resection of rectum                                       | 48.65 |
| Other partial proctectomy, rectal resection NOS                   | 48.69 |
| Pull-through resection of rectum, not otherwise specified         | 48.40 |
| Soave submucosal resection of rectum                              | 48.41 |
| Laparoscopic pull-through resection of rectum                     | 48.42 |
| Open pull-through resection of rectum                             | 48.43 |
| Other pull-through resection of rectum                            | 48.49 |

---

**Supplemental Table 3.** International Classification of Diseases, 9<sup>th</sup> revision, Clinical Modification diagnosis codes for perioperative/postoperative in-hospital complications

| <b>Complication</b>                                                 | <b>ICD-9-CM</b>   |
|---------------------------------------------------------------------|-------------------|
| <b>Mechanical wound</b>                                             |                   |
| Delayed wound healing                                               | 998.83            |
| Postoperative hematoma                                              | 998.12            |
| Postoperative seroma (non-infected)                                 | 998.13            |
| Disruption of operative wound                                       | 998.30-2          |
| Persistent postoperative fistula                                    | 998.6             |
| <b>Infection</b>                                                    |                   |
| Postoperative infection                                             | 998.5             |
| Postoperative skin disease                                          | 998.59            |
| Postoperative septic wound complication                             | 998.59            |
| Postoperative skin infection                                        | 998.59            |
| Postoperative intra-abdominal abscess                               | 998.59            |
| Postoperative sub-diaphragmatic abscess                             | 998.59            |
| Postoperative infected seroma                                       | 998.51            |
| Sepsis/Septicemia                                                   | 038.0-9; 995.91-2 |
| <b>Urinary complication</b>                                         |                   |
| Postoperative urinary retention                                     | 997.5             |
| Postoperative urinary tract infection                               | 996.64; 997.5     |
| <b>Pulmonary complication</b>                                       |                   |
| Ventilator associated pneumonia                                     | 997.31            |
| Post-procedural aspiration pneumonia                                | 997.32            |
| Other respiratory complications                                     | 997.39            |
| Postoperative acute respiratory insufficiency                       | 518.5             |
| Iatrogenic pneumothorax                                             | 512.1             |
| Postoperative air leak                                              | 512.2             |
| Adult Respiratory Distress Syndrome (ARDS)                          | 518.5             |
| Postoperative pulmonary edema                                       | 518.4             |
| <b>Gastrointestinal tract (GI) complication</b>                     |                   |
| Postoperative small bowel obstruction                               | 997.4             |
| Postoperative ileus                                                 | 997.4             |
| Postoperative ileus requiring nasogastric tube                      | 997.4             |
| Postoperative nausea                                                | 997.4             |
| Postoperative vomiting                                              | 997.4             |
| Postoperative pancreatitis                                          | 997.4             |
| Other digestive system complications                                | 997.49            |
| <b>Cardiovascular complication</b>                                  |                   |
| Postoperative deep venous thrombosis                                | 997.79            |
| Postoperative pulmonary embolism                                    | 415.11            |
| Postoperative stroke                                                | 997.02            |
| Phlebitis or thrombophlebitis from procedure                        | 997.2             |
| Cardiac arrest/insufficiency during or resulting from procedure     | 997.1             |
| <b>Systemic complication</b>                                        |                   |
| Postoperative shock (septic, hypovolemic)                           | 998.0             |
| Other specified complications of procedure not elsewhere classified | 998.89            |
| Unspecified complication of procedure not elsewhere classified      |                   |

|                                                         |        |
|---------------------------------------------------------|--------|
|                                                         | 998.9  |
| <b>Complications during surgical procedure</b>          |        |
| Accidental puncture or laceration, complicating surgery | 998.2  |
| Foreign body accidentally left during procedure         | 998.4  |
| Hemorrhage/bleeding, complicating surgery               | 998.11 |

---
